# Supplementary material for: A series of Fas receptor agonist antibodies that demonstrate an inverse correlation between affinity and potency
Source: PubMed Central journal article supplement — Cell Death Differ. 2012 Jan 20;19(7):1187–95. doi: 10.1038/cdd.2011.208 (PMC3374083; doi:10.1038/cdd.2011.208), 2012-01-20
Supplement: cdd2011208x1.pdf [file cdd2011208x1.pdf]

## Supplementary Figure 1

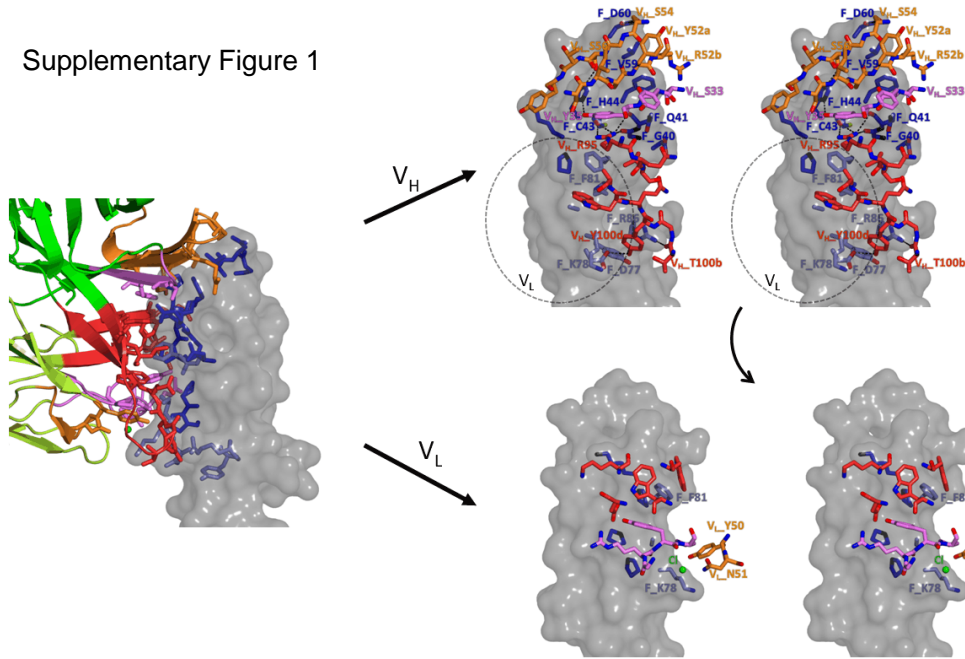

**Supplementary Figure 1: Interface of the E09:Fas structure.** The two interfaces formed by  $V_H$  and  $V_L$  of E09 with Fas are shown in stereo. The Fas receptor is represented as a surface with the epitope residues displayed as blue and light blue sticks for CRD1 and CRD2, respectively. The paratope residues of CDRs 1, 2 and 3 of  $V_H$  and  $V_L$  are represented as sticks and colored violet, orange and red, respectively. In the  $V_H$  epitope the position of the  $V_L$  epitope is indicated by the dashed circle.

## Supplementary Figure 2

### Heavy chain sequence alignment

|                 | FW 1                                                                                                                                                                                                                   | CDR 1                                                                               | FW 2 | CDR 2 |
|-----------------|------------------------------------------------------------------------------------------------------------------------------------------------------------------------------------------------------------------------|-------------------------------------------------------------------------------------|------|-------|
| Kabat numbering | 1 2 3 4 5 6 7 8 9 10 11 12 13 14 15 16 17 18 19 20 21 22 23 24 25 26 27 28 29 30 31 32 33 34 35 36a 36b 36c 37 38 39 40 41 42 43 44 45 46 47 48 49 50 51 52 52a 52b 52c 52d 52e 53 54 55 56 57 58 59 60 61 62 63 64 65 |                                                                                     |      |       |
| E09             | Q L Q L Q R E S G P G L V K P S E T L S L T C T V S G A S I S                                                                                                                                                          | A N S Y Y G V W V R Q S P G K G L E W V G S I A Y R G N S N S G S T Y Y N P S L K S |      |       |
| EP12r_E01       | Q L Q L Q R E S G P G L V K P S E T L S L T C T V S G A S I S                                                                                                                                                          | A N S Y Y G V W V R Q S P G K G L E W V G S I A Y R G N S N S G S T Y Y N P S L K S |      |       |
| EP4b_E03        | Q L Q L Q R E S G P G L V K P S E T L S L T C T V S G A S I S                                                                                                                                                          | A N S Y Y G V W V R Q S P G K G L E W V G S I A Y R G N S N S G S T Y Y N P S L K S |      |       |
| EP5b_E05        | Q L Q L Q R E S G P G L V K P S E T L S L T C T V S G A S I S                                                                                                                                                          | A N S Y Y G V W V R Q S P G K G L E W V G S I A Y R G N S N S G S T Y Y N P S L K S |      |       |
| EP6b_B01        | Q L Q L Q R E S G P G L V K P S E T L S L T C T V S G A S I S                                                                                                                                                          | A N S Y Y G V W V R Q S P G K G L E W V G S I A Y R G N S N S G S T Y Y N P S L K S |      |       |

  

|                 | FW 3                                                                                                                                                                                                                   | CDR 3 | FW 4 |
|-----------------|------------------------------------------------------------------------------------------------------------------------------------------------------------------------------------------------------------------------|-------|------|
| Kabat numbering | 66 67 68 69 70 71 72 73 74 75 76 77 78 79 80 81 82 82a 82b 82c 83 84 85 86 87 88 89 90 91 92 93 94 95 96 97 98 99 100 100a 100b 100c 100d 100e 100f 100g 100h 100i 101 102 103 104 105 106 107 108 109 110 111 112 113 |       |      |
| E09             | R A T V S V D T S K N Q V S L R L T S V T A A D T A L Y C A R R Q L L D D D G T G Y Q W A A F D V W G Q G T M V T V S S                                                                                                |       |      |
| EP12r_E01       | R A T V S V D T S K N Q V S L R L T S V T A A D T A L Y C A R R Q L L D D D G T G Y Q W A A F D V W G Q G T M V T V S S                                                                                                |       |      |
| EP4b_E03        | R A T V S V D T S K N Q V S L R L T S V T A A D T A L Y C A R R Q L L D D D G T G Y Q W A A F D V W G Q G T M V T V S S                                                                                                |       |      |
| EP5b_E05        | R A T V S V D T S K N Q V S L R L T S V T A A D T A L Y C A R R Q L L D D D G T G Y Q W A A F D V W G Q G T M V T V S S                                                                                                |       |      |
| EP6b_B01        | R A T V S V D T S K N Q V S L R L T S V T A A D T A L Y C A R R Q L L D D D G T G Y Q W A A F D V W G Q G T M V T V S S                                                                                                |       |      |

### Light chain sequence alignment

|                 | FW 1                                                                                                                                                                       | CDR 1                                           | FW 2            | CDR 2 |
|-----------------|----------------------------------------------------------------------------------------------------------------------------------------------------------------------------|-------------------------------------------------|-----------------|-------|
| Kabat numbering | 1 2 3 4 5 6 7 8 9 10 11 12 13 14 15 16 17 18 19 20 21 22 23 24 25 26 27 27a 27b 27c 28 29 30 31 32 33 34 35 36 37 38 39 40 41 42 43 44 45 46 47 48 49 50 51 52 53 54 55 56 |                                                 |                 |       |
| E09             | Q S V L T Q P P P S V S E A P R Q T V T I S C S G N S                                                                                                                      | F N I G R Y P V N W Y Q Q L P G K A P K L L I Y | Y V N L R R F S |       |
| EP12r_E01       | Q S V L T Q P P P S V S E A P R Q T V T I S C S G N S                                                                                                                      | F N I G R Y P V N W Y Q Q L P G K A P K L L I Y | Y V N L R R F S |       |
| EP4b_E03        | Q S V L T Q P P P S V S E A P R Q T V T I S C S G N S                                                                                                                      | F N I G R Y P V N W Y Q Q L P G K A P K L L I Y | Y V N L R R F S |       |
| EP5b_E05        | Q S V L T Q P P P S V S E A P R Q T V T I S C S G N S                                                                                                                      | F N I G R Y P V N W Y Q Q L P G K A P K L L I Y | Y V N L R R F S |       |
| EP6b_B01        | Q S V L T Q P P P S V S E A P R Q T V T I S C S G N S                                                                                                                      | F N I G R Y P V N W Y Q Q L P G K A P K L L I Y | Y V N L R R F S |       |

  

|                 | FW 3                                                                                                                                                                                                                                  | CDR 3 | FW 4 |
|-----------------|---------------------------------------------------------------------------------------------------------------------------------------------------------------------------------------------------------------------------------------|-------|------|
| Kabat numbering | 57 58 59 60 61 62 63 64 65 66 67 68 69 70 71 72 73 74 75 76 77 78 79 80 81 82 83 84 85 86 87 88 89 90 91 92 93 94 95 96 97 98 99 100 100a 100b 100c 100d 100e 100f 100g 100h 100i 101 102 103 104 105 106 107 108 109 110 111 112 113 |       |      |
| E09             | G V S D R F S G S K S G T S A S L A I R D L L S E D E A D Y Y C S T W D D D T L K G W V F G G G T K V T V L                                                                                                                           |       |      |
| EP12r_E01       | G V S D R F S G S K S G T S A S L A I R D L L S E D E A D Y Y C S T W D D D T L K G W V F G G G T K V T V L                                                                                                                           |       |      |
| EP4b_E03        | G V S D R F S G S K S G T S A S L A I R D L L S E D E A D Y Y C S T W D D D T L K G W V F G G G T K V T V L                                                                                                                           |       |      |
| EP5b_E05        | G V S D R F S G S K S G T S A S L A I R D L L S E D E A D Y Y C S T W D D D T L K G W V F G G G T K V T V L                                                                                                                           |       |      |
| EP6b_B01        | G V P D R F S G S K S G T S A S L A I R D L L S E D E A D Y Y C S T W D D D T L K G W V F G G G T K V T V L                                                                                                                           |       |      |

**Supplementary Figure 2: Amino acid sequence alignment for E09 and variant antibodies.** Heavy (top) and light (bottom) variable domain sequences are aligned versus the parental E09 antibody and differences are shown in pink. Hotspot mutations found in the round 6 population are highlighted in boxes.

### Supplementary Figure 3

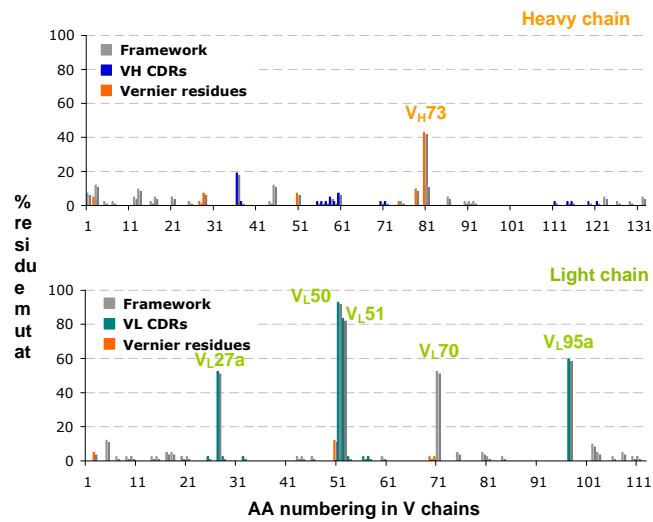

**Supplementary Figure 3: Analysis of mutations after the directed evolution process.** The percentage of residues mutated following 6 rounds of directed evolution selection is shown for both the heavy (top) and light (bottom) chains. Amino acids are numbered numerically. Positions mutated above 20% were defined as hotspots. Residues in the framework regions, the CDR loops and at Vernier positions are shown in grey, blue and orange bars, respectively.

### Supplementary Figure 4

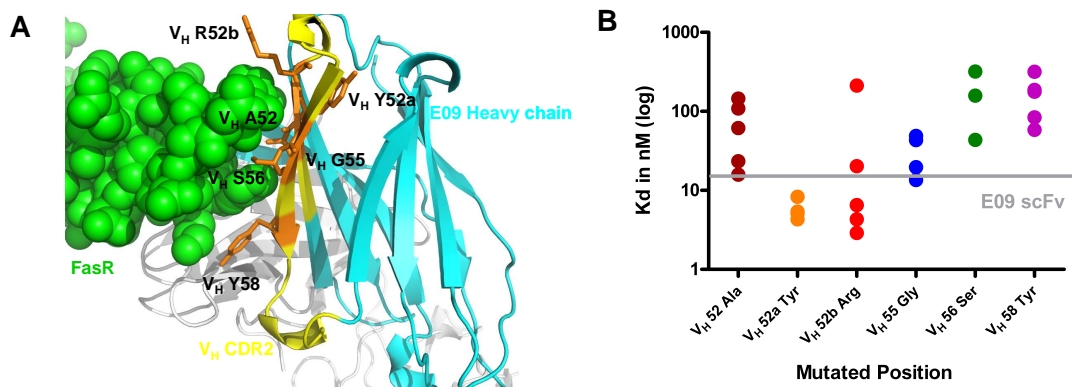

**Supplementary Figure 4: Fas receptor affinity modulation by single point mutagenesis.** A) Close-up view of the E09 heavy chain (cyan) in complex with the cysteine-rich repeat domain (CRD)-1 of Fas (green). Heavy chain CDR2 loop is shown in yellow and the 6 residues chosen for site-directed mutagenesis are shown in orange. B) Affinity of single point-mutants for Fas receptor as determined by SPR. Point mutants were purified as scFv and run as analyte on Fas ECD in fusion with Fc fragment previously immobilised on Protein G-immobilised CM5 chip. Points, each one representing a different sidechain replacement, were grouped by the residue mutated and sorted by K<sub>d</sub> value on the Y-axis. Affinity of the parent E09 is shown as a grey line.

## Supplementary Figure 5

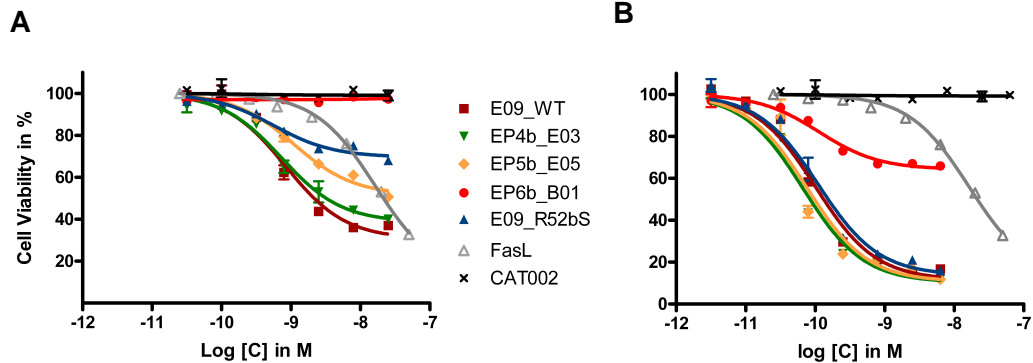

**Supplementary Figure 5: Influence of cross-linking IgGs on cell viability.** Dose-dependent *in vitro* cell killing of Jurkat cells by anti-Fas E09 and variant antibodies without (A) or with (B) protein A cross-linking prior to the assay.

**Supplementary Table 1**

| A. Diffraction data                                 | sFasR:E09                                                | EP6b_B01:sFasR                                          |
|-----------------------------------------------------|----------------------------------------------------------|---------------------------------------------------------|
| Space group                                         | C2221                                                    | P3121                                                   |
| Unit cell constants [ $\text{\AA}$ ] / [ $^\circ$ ] | a= 89.49, b= 166.40, c= 110.72; $\alpha=\beta=\gamma=90$ | a=b= 94.51, c= 139.20<br>$\alpha=\beta= 90, \gamma=120$ |
| Resolution [ $\text{\AA}$ ]                         | 46.09 – 1.93 (1.98-1.93) <sup>a</sup>                    | 47.26-2.10 (2.15-2.10)                                  |
| Rsym [%]                                            | 4.5 (43.9)                                               | 10.4 (63.7)                                             |
| I/ $\sigma$                                         | 22.51 (4.73)                                             | 16.04 (4.13)                                            |
| No. of reflections                                  | 398919                                                   | 425950                                                  |
| No. of unique reflections                           | 61296                                                    | 42586                                                   |
| Completeness [%]                                    | 98.3 (99.6)                                              | 100 (100)                                               |
| A. Refinement                                       |                                                          |                                                         |
| No. of reflections work / test                      | 58229 / 3064                                             | 40441 / 2129                                            |
| Rwork/Rfree                                         | 0.200/0.225                                              | 0.182 / 0.224                                           |
| Number of atoms                                     | 8568 (incl. H)                                           | 8204 (incl. H)                                          |
| Number of residues                                  |                                                          | 519                                                     |
| Number of heteromolecules                           | 2 Cd, 1 Cl, 6 EDO                                        | 2 NAG, 1 FUC, 5 EDO, 1 Na                               |
| Number of waters                                    | 411                                                      | 349                                                     |
| Rmsd (bonds) [ $\text{\AA}$ ]                       | 0.008                                                    | 0.006                                                   |
| Rmsd (angles) [ $^\circ$ ]                          | 1.104                                                    | 0.955                                                   |
| DPI                                                 |                                                          |                                                         |
| Biso [ $\text{\AA}^2$ ]                             | 49.06                                                    | 39.85                                                   |
| Wilson B [ $\text{\AA}^2$ ]                         | 34.83                                                    | 29.48                                                   |
| Ramachandran plot (Molprobit)                       |                                                          |                                                         |
| Residues in most favored region [%]                 | 95.9                                                     | 96.7                                                    |
| Outliers [%]                                        | 0.2                                                      | 0                                                       |
| Molprobit score                                     | 1.32                                                     | 1.35                                                    |

<sup>a</sup> Numbers in parentheses refer to the highest resolution shell

Supplementary  
Table 2

| Fas Residue | ASA    | BSA    | %     | $\Delta$ iG | additional Interaction |
|-------------|--------|--------|-------|-------------|------------------------|
| 39 Asp      | 113.34 | 26.71  | 23.6  | -0.14       |                        |
| 40 Gly      | 16.42  | 8.16   | 49.7  | 0.01        | H-bond                 |
| 41 Gln      | 158.17 | 115.93 | 73.3  | -0.91       | H-bond                 |
| 42 Phe      | 110.85 | 90.97  | 82.1  | 1.37        |                        |
| 43 Cys      | 13.63  | 12.8   | 93.9  | -0.14       | H-bond                 |
| 44 His      | 159.67 | 149.84 | 93.8  | 0.75        | H-bond                 |
| 45 Lys      | 132.81 | 66.64  | 50.2  | 0.45        |                        |
| 46 Pro      | 70.77  | 65.56  | 92.6  | 0.92        |                        |
| 47 Cys      | 0.47   | 0.47   | 100.0 | 0.01        |                        |
| 48 Pro      | 64.61  | 47.06  | 72.8  | 0.75        |                        |
| 49 Pro      | 60.24  | 22.59  | 37.5  | 0.36        |                        |
| 58 Thr      | 80.89  | 3.19   | 3.9   | -0.04       |                        |
| 59 Val      | 109.77 | 93.45  | 85.1  | 0.97        |                        |
| 60 Asn      | 136.96 | 12.25  | 8.9   | -0.2        |                        |
| 61 Gly      | 42.6   | 0.74   | 1.7   | -0.01       |                        |
| 75 Tyr      | 18.64  | 3.19   | 17.1  | -0.04       |                        |
| 76 Thr      | 5.37   | 0.34   | 6.3   | 0.01        |                        |
| 77 Asp      | 66.7   | 14.77  | 22.1  | -0.16       | H-bond                 |
| 78 Lys      | 146.82 | 64.18  | 43.7  | 0.64        |                        |
| 79 Ala      | 57.03  | 54.31  | 95.2  | 0.34        |                        |
| 80 His      | 35.43  | 17.32  | 48.9  | 0.28        |                        |
| 81 Phe      | 90.24  | 85.64  | 94.9  | 1.33        | Cation-Pi              |
| 86 Arg      | 150.11 | 73.57  | 49.0  | -1.37       | H-bond / Cation-Pi     |

**Supplementary Table 2: Interface residues in the E09:Fas complex determined by PISA.**

The antibody residues are numbered with the Kabat system. The accessible surface area (ASA) and the buried surface area (BSA) in Å<sup>2</sup> of the indicated interface residues are indicated with the change in percent upon complex formation. The solvation energy effect is shown as  $\Delta$ iG in kcal/mol. Interaction types are also listed.

Supplementary  
Table 2  
(continued)

| E09 V <sub>L</sub> Residue | ASA    | BSA   | %    | $\Delta$ iG | additional Interaction |
|----------------------------|--------|-------|------|-------------|------------------------|
| 29 Gly                     | 35.57  | 0.74  | 2.1  | -0.01       |                        |
| 30 Arg                     | 132.17 | 48.59 | 36.8 | 0.09        |                        |
| 31 Tyr                     | 48.59  | 48.22 | 99.2 | 0.22        |                        |
| 32 Pro                     | 19.4   | 13.32 | 68.7 | 0.21        |                        |
| 50 Tyr                     | 41.42  | 31.13 | 75.2 | 0.05        |                        |
| 51 Asn                     | 27.62  | 10.33 | 37.4 | -0.12       |                        |
| 91 Trp                     | 56.48  | 53.55 | 94.8 | 0.74        |                        |
| 93 Asp                     | 41.34  | 3.81  | 9.2  | -0.05       |                        |
| 95A Lys                    | 124.46 | 13.85 | 11.1 | 0.21        |                        |
| 96 Trp                     | 16.98  | 8.34  | 49.1 | 0.09        |                        |
| E09 V <sub>H</sub> Residue | ASA    | BSA   | %    | $\Delta$ iG | additional Interaction |
| 33 Ser                     | 67.8   | 41.47 | 61.2 | 0.06        |                        |
| 34 Tyr                     | 17.15  | 3.24  | 18.9 | 0.05        |                        |
| 35 Tyr                     | 42.96  | 40.63 | 94.6 | 0.22        | H-bond                 |
| 50 Ser                     | 1.46   | 1.34  | 91.8 | 0.02        |                        |
| 51 Ile                     | 7.87   | 0.17  | 2.2  | 0           |                        |
| 52 Ala                     | 41.35  | 40.59 | 98.2 | 0.47        |                        |
| 52A Tyr                    | 5.69   | 2.74  | 48.2 | 0.02        |                        |
| 52B Arg                    | 126.28 | 40.23 | 31.9 | -0.09       |                        |
| 52E Ser                    | 65.91  | 7.54  | 11.4 | 0.02        |                        |
| 54 Ser                     | 61.25  | 20.8  | 34.0 | -0.05       |                        |
| 55 Gly                     | 37.95  | 8.9   | 23.5 | 0.12        |                        |
| 56 Ser                     | 75.16  | 47.26 | 62.9 | 0.13        | H-bond                 |
| 57 Thr                     | 57.92  | 4.96  | 8.6  | 0           |                        |
| 58 Tyr                     | 85.96  | 48.04 | 55.9 | 0.65        |                        |
| 95 Arg                     | 58.15  | 57.53 | 98.9 | -2.97       | H-bond / Cation-Pi     |
| 96 Gln                     | 64.18  | 7.25  | 11.3 | -0.11       |                        |
| 97 Leu                     | 100    | 70.21 | 70.2 | 1.05        |                        |
| 100B Thr                   | 95.72  | 9.82  | 10.3 | -0.11       | H-bond                 |
| 100C Gly                   | 66.05  | 11.36 | 17.2 | 0.08        |                        |
| 100D Tyr                   | 134.1  | 98.37 | 73.4 | 0.6         | H-bond/Cation-Pi       |
| 100E Gln                   | 100.78 | 36.39 | 36.1 | -0.42       |                        |
| 100F Trp                   | 46.55  | 45.97 | 98.8 | 0.74        |                        |
| 100H Ala                   | 5.81   | 5.53  | 95.2 | 0.09        |                        |

### Supplementary Table 3

#### E09 mutants (scFv)

| # | scFv      | Mutation  | kd (1/s) | ka (1/Ms) | KD (M)  | Change KD/parent |
|---|-----------|-----------|----------|-----------|---------|------------------|
| 1 | E09_WT    | /         | 2.4E-03  | 2.8E+05   | 8.6E-09 | 1.0              |
| 2 | E09_H73S  | H73_T>S   | 1.3E-03  | 3.6E+05   | 3.5E-09 | 2.4              |
| 3 | E09_L27aS | L27a_F>S  | 2.0E-03  | 2.5E+05   | 7.9E-09 | 1.1              |
| 4 | E09_L50S  | L50_Y>S   | 2.9E-04  | 3.3E+05   | 8.7E-10 | 9.8              |
| 5 | E09_L51D  | L51_N>D   | 5.0E-04  | 4.5E+05   | 1.1E-09 | 7.8              |
| 6 | E09_L59P  | L59_S>P   | 2.6E-03  | 3.3E+05   | 8.0E-09 | 1.1              |
| 7 | E09_L70T  | L70_S>T   | 2.6E-03  | 3.0E+05   | 8.5E-09 | 1.0              |
| 8 | E09_L95aE | L95aE_K>E | 1.9E-03  | 2.9E+05   | 6.7E-09 | 1.3              |

#### EP6bB01 revertants (scFv)

| # | scFv       | Mutation  | kd (1/s) | ka (1/Ms) | KD (M)  | Change KD/parent |
|---|------------|-----------|----------|-----------|---------|------------------|
| 1 | EP6B_WT    | /         | 7.8E-05  | 4.2E+05   | 1.8E-10 | 1.0              |
| 2 | EP6B_H73S  | H73_S>T   | 9.3E-05  | 4.8E+05   | 2.0E-10 | 1.1              |
| 3 | EP6B_L27aS | L27a_S>F  | 1.0E-04  | 5.6E+05   | 1.8E-10 | 1.0              |
| 4 | EP6B_L50S  | L50_S>Y   | 1.4E-04  | 3.9E+05   | 3.7E-10 | 2.0              |
| 5 | EP6B_L51D  | L51_D>N   | 1.1E-04  | 3.2E+05   | 3.3E-10 | 1.8              |
| 6 | EP6B_L59P  | L59_P>S   | 1.3E-04  | 4.1E+05   | 3.1E-10 | 1.7              |
| 7 | EP6B_L70T  | L70_T>S   | 8.4E-05  | 5.2E+05   | 1.6E-10 | 0.9              |
| 8 | EP6B_L95aE | L95aE_E>K | 1.0E-04  | 5.0E+05   | 2.0E-10 | 1.1              |

**Supplementary Table 3: Affinity data for E09 point mutants and EP6b\_B01 revertants.** The seven mutations found in the high affinity antibody EP6b\_B01 were individually introduced in the parent E09 backbone or removed from EP6b\_B01 to measure their impact on affinity improvement. Kinetic parameters and affinity for recombinant Fas of the mutants, revertants, parent E09 and EP6b\_B01 were determined by BIAcore. KA values (1/KD in M<sup>-1</sup>) were used to calculate free energy of binding compared to the parent E09 ( $\Delta\Delta G_0(\text{mut.}-\text{WT})$ ) presented in Figure 4B.

### Supplementary Table 4

| Antibody  | Cell killing efficiency (%) | Cell killing EC <sub>50</sub> (nM) |
|-----------|-----------------------------|------------------------------------|
| E09       | 75                          | 0.74                               |
| EP12r_E01 | 77                          | 0.90                               |
| EP4b_E03  | 63                          | 0.80                               |
| EP5b_E05  | 43                          | 0.96                               |
| EP6b_B01  | Non Functional              | Non Functional                     |
| E09_Y58W  | 59                          | 2.69                               |
| E09_Y52aR | 75                          | 1.82                               |
| E09_R52bS | 34                          | 0.63                               |

**Supplementary Table 4: Cell killing data for E09 and variant antibodies.** Cell killing efficiency and EC<sub>50</sub> were determined from *in vitro* viability assays using Jurkat cells and a titration of the anti-Fas antibodies without cross-linking.
